# Supplementary material for: Antithrombotic Use Patterns in COVID-19 Patients from Spain: A Real-World Data Study
Source: MDPI journal article supplement (doi:10.3390/jcm13082403), 2024-04-20
Supplement: s1 [file s1]

**Table S1. Antthrombotic agents, ATC codes****B01AA Vitamin K antagonists**

| ATC code | Name                 |
|----------|----------------------|
| B01AA01  | dicoumarol           |
| B01AA02  | phenindione          |
| B01AA03  | warfarin             |
| B01AA04  | phenprocoumon        |
| B01AA07  | acenocoumarol        |
| B01AA08  | ethyl biscoumacetate |
| B01AA09  | clorindione          |
| B01AA10  | diphenadione         |
| B01AA11  | tiocloamarol         |
| B01AA12  | fluindione           |

**B01AB Heparin group**

| ATC code | Name                  |
|----------|-----------------------|
| B01AB01  | heparin               |
| B01AB02  | antithrombin III      |
| B01AB04  | dalteparin            |
| B01AB05  | enoxaparin            |
| B01AB06  | nadroparin            |
| B01AB07  | parnaparin            |
| B01AB08  | reviparin             |
| B01AB09  | danaparoid            |
| B01AB10  | tinzaparin            |
| B01AB11  | sulodexide            |
| B01AB12  | bemiparin             |
| B01AB51  | heparin, combinations |

**B01AC Platelet aggregation inhibitors excl. heparin**

| ATC code | Name                 |
|----------|----------------------|
| B01AC01  | ditazole             |
| B01AC02  | cloricromen          |
| B01AC03  | picotamide           |
| B01AC04  | clopidogrel          |
| B01AC05  | ticlopidine          |
| B01AC06  | acetylsalicylic acid |
| B01AC07  | dipyridamole         |
| B01AC08  | carbasalate calcium  |
| B01AC09  | epoprostenol         |
| B01AC10  | indobufen            |
| B01AC11  | iloprost             |
| B01AC13  | abciximab            |
| B01AC15  | aloxiprin            |
| B01AC16  | eptifibatide         |
| B01AC17  | tirofiban            |

**TABLE S2. Population characteristics based on their antithrombotic use patterns.**

| Characteristics             | Users*                   |                      | p value |
|-----------------------------|--------------------------|----------------------|---------|
|                             | n=79,234 (9%)            |                      |         |
|                             | Primary care<br>n=37,183 | Hospital<br>n=42,051 |         |
| Gender                      |                          |                      |         |
| Female                      | 19 544<br>(52.6%)        | 18 713<br>(45.5%)    | < 0.001 |
| Male                        | 17 639<br>(47.4%)        | 23 338<br>(55.5%)    |         |
| Age (y)                     |                          |                      |         |
| Median, years (IQR)         | 70 (57-82)               | 70 (56-83)           |         |
| 18-25                       | 418<br>(1.1%)            | 412<br>(0.9%)        |         |
| 25-40                       | 3 060<br>(8.3%)          | 2 580<br>(6.1%)      |         |
| 40-55                       | 4 758<br>(12.8%)         | 6 716<br>(16%)       | < 0.001 |
| 55-70                       | 10 128<br>(27.2%)        | 10 874<br>(25.9%)    |         |
| >70                         | 18 819<br>(50.6%)        | 21 469<br>(51.1%)    |         |
| Comorbidities               |                          |                      |         |
| Obesity                     | 7 743<br>(20.9%)         | 8 928<br>(21.2%)     | 0.160   |
| Cardiovascular diseases     | 26 491<br>(72.5%)        | 25 736<br>(61.2%)    | < 0.001 |
| Hypertension                | 21 169<br>(56.9%)        | 22 141<br>(52.7%)    | < 0.001 |
| Heart failure               | 3 164<br>(8.5%)          | 4 127<br>(9.8%)      | < 0.001 |
| Arrhythmia                  | 8 758<br>(23.6%)         | 7 131<br>(17%)       | < 0.001 |
| Ischemic heart disease      | 7 673<br>(20.6%)         | 4 677<br>(11.1%)     | < 0.001 |
| Coronary artery disease     | 5 576<br>(15%)           | 3 402<br>(8.1%)      | < 0.001 |
| IAM                         | 3 576<br>(9.6%)          | 1 779<br>(4.2%)      | < 0.001 |
| Valvopathies                | 1 340<br>(3.6%)          | 1 184<br>(2.8%)      | < 0.001 |
| Peripheral arterial disease | 1 638<br>(4.4%)          | 1 370<br>(3.3%)      | < 0.001 |
| Cancer history              | 4 592<br>(12.3%)         | 6 157<br>(14.6%)     | < 0.001 |
| Hereditary thrombophilia    | 111<br>(0.3%)            | 40<br>(0.1%)         | < 0.001 |
| Stroke                      | 5 615<br>(15.1%)         | 3 805<br>(9%)        | < 0.001 |
| Ischemic stroke             | 5 471<br>(14.7%)         | 3 603<br>(8.6%)      | < 0.001 |
| Hemorrhagic stroke          | 287<br>(0.8%)            | 325<br>(0.8%)        | 0.987   |
| Acute liver disease         | 9<br>(0.02%)             | 9<br>(0.02%)         | 0.794   |

**Table S3. Medications prescribed within six months before COVID-19 diagnosis**

| Medicines                                                            | Non-users                         |                     | Primary care users.                |                                    |                                  | Hospitals users                    |                                    |                                   |
|----------------------------------------------------------------------|-----------------------------------|---------------------|------------------------------------|------------------------------------|----------------------------------|------------------------------------|------------------------------------|-----------------------------------|
|                                                                      | All cases<br>n=882,540 (100<br>%) | n=803,306 (91<br>%) | Global users<br>n=37,183<br>(4,2%) | Prevalent<br>users<br>n=29,678 (%) | Incident<br>users<br>n=7,505 (%) | Global users<br>n=42,051<br>(4,8%) | Prevalent<br>users<br>n=21,751 (%) | Incident<br>users<br>n=20,300 (%) |
| A10 Drugs used in diabetes                                           | 60 308 (6.8%)                     | 42 107 (5.2%)       | 9.040 (24.3%)                      | 8.594 (29.0%)                      | 446 (5.9%)                       | 9.161 (21.8%)                      | 6.703 (30.8%)                      | 2.458(12.1%)                      |
| A10A Insulins and analogues                                          | 17 812 (2.0%)                     | 11 355 (1.4%)       | 2.915 (7.8%)                       | 2.812 (9.5%)                       | 103 (1.4%)                       | 3.542 (8.4%)                       | 2.905 (13.4%)                      | 637 (3.1%)                        |
| A10B Blood glucose lowering drugs, excluding insulins                | 53 414 (6.1%)                     | 37 245 (4.6%)       | 8.205 (22.1%)                      | 7.806 (26.3%)                      | 399 (5.3%)                       | 7.964 (18.9%)                      | 5.723 (26.3%)                      | 2.241 (11.0%)                     |
| C01B Antiarrhythmics, class I and III                                | 4 281 (0.5%)                      | 2.419 (0.3%)        | 1.049 (2.8%)                       | 1.040 (3.5%)                       | 9 (0.1%)                         | 813 (1.9%)                         | 763 (3.5%)                         | 50 (0.2%)                         |
| C02 Antihypertensives                                                | 7 452 (0.8%)                      | 4.624 (0.6%)        | 1.157 (3.1%)                       | 1.106 (3.7%)                       | 51 (0.7%)                        | 1.671 (4.0%)                       | 1.311 (6.0%)                       | 360 (1.8%)                        |
| C02C Antiadrenergic agents, peripherally acting                      | 6 930 (0.8%)                      | 4.247 (0.5%)        | 1.084 (2.9%)                       | 1.039 (3.5%)                       | 45 (0.6%)                        | 1.599 (3.8%)                       | 1.256 (5.8%)                       | 343 (1.7%)                        |
| C03 Diuretics                                                        | 50 612 (57%)                      | 30.852 (3.8%)       | 8.424 (22.7%)                      | 8.046 (27.1%)                      | 378 (5.0%)                       | 11.336(27.0%)                      | 9.206 (42.3%)                      | 2.130 (10.5%)                     |
| C03A Low-ceiling diuretics, thiazides                                | 5 605 (0.6%)                      | 3.846 (0.5%)        | 649 (1.7%)                         | 603 (2.0%)                         | 46 (0.6%)                        | 1.110 (2.6%)                       | 807 (3.7%)                         | 303 (1.5%)                        |
| C03B Low-ceiling diuretics, excluding thiazides                      | 4 476 (0.5%)                      | 3.344 (0.4%)        | 509 (1.4%)                         | 455 (1.5%)                         | 54 (0.7%)                        | 623 (1.5%)                         | 409 (1.9%)                         | 214 (1.1%)                        |
| C03C High-ceiling diuretics                                          | 38 057 (4.3%)                     | 21.520 (2.7%)       | 6.775 (18.2%)                      | 6.530 (22.0%)                      | 245 (3.3%)                       | 9.762 (23.2%)                      | 8.241 (37.9%)                      | 1.521 (7.5%)                      |
| C03D Aldosterone antagonists and other potassium-sparing agents      | 7 656 (0.9%)                      | 4.290 (0.5%)        | 1.573 (4.2%)                       | 1.546 (5.2%)                       | 27 (0.4%)                        | 1.793 (4.3%)                       | 1.624 (7.5%)                       | 169 (0.8%)                        |
| C03E Diuretics and potassium-sparing agents in combination           | 2 559 (0.3%)                      | 1.871 (0.2%)        | 319 (0.9%)                         | 282 (1.0%)                         | 37 (0.5%)                        | 369 (0.9%)                         | 233 (1.1%)                         | 136 (0.7%)                        |
| C07 Beta blocking agents                                             | 48 225 (5.5%)                     | 30.167 (3.8%)       | 10.318(27.7%)                      | 10.098(34.0%)                      | 220 (2.9%)                       | 7.740 (18.4%)                      | 6.670 (30.7%)                      | 1.070 (5.3%)                      |
| C07A Beta blocking agents                                            | 46 821 (5.3%)                     | 29.072 (3.6%)       | 10.130 (27.2%)                     | 9.923 (33.4%)                      | 207 (2.8%)                       | 7.619 (18.1%)                      | 6.597 (30.3%)                      | 1.022 (5.0%)                      |
| C07B Beta blocking agents and thiazides                              | 1 028 (0.1%)                      | 795 (0.1%)          | 128 (0.3%)                         | 119 (0.4%)                         | 9 (0.1%)                         | 105 (0.2%)                         | 66 (0.3%)                          | 39 (0.2%)                         |
| C08 Calcium channel blockers                                         | 30 323 (3.4%)                     | 19.734 (2.5%)       | 4.758 (12.8%)                      | 4.548 (15.3%)                      | 210 (2.8%)                       | 5.831 (13.9%)                      | 4.469 (20.5%)                      | 1.362 (6.7%)                      |
| C08C Selective calcium channel blockers with mainly vascular effects | 26 856 (3.0%)                     | 17.714 (2.2%)       | 3.947 (10.6%)                      | 3.745 (12.6%)                      | 202 (2.7%)                       | 5.195 (12.4%)                      | 3.899 (17.9%)                      | 1.296 (6.4%)                      |
| C08D Selective calcium channel blockers with direct cardiac effects  | 3 717 (0.4%)                      | 2.130 (0.3%)        | 866 (2.3%)                         | 857 (2.9%)                         | 9 (0.1%)                         | 721 (1.7%)                         | 654 (3.0%)                         | 67 (0.3%)                         |
| C09 Agents acting on the renin-angiotensin system                    | 126 782(14.4%)                    | 94.361 (11.7%)      | 16.337 (43.9%)                     | 15.289 (51.5%)                     | 1.048(14.0%)                     | 16.084 (38.2%)                     | 10.918(50.2%)                      | 5.166 (25.4%)                     |

|                                                            |                |                |                |                |               |                |                |               |
|------------------------------------------------------------|----------------|----------------|----------------|----------------|---------------|----------------|----------------|---------------|
| C09A ACE inhibitors, plain                                 | 39 155 (4.4%)  | 28.161 (3.5%)  | 5.502 (14.8%)  | 5.167 (17.4%)  | 335 (4.5%)    | 5.492 (13.1%)  | 3.987 (18.3%)  | 1.505 (7.4%)  |
| C09B ACE inhibitors, combinations                          | 13 761 (1.6%)  | 10.728 (1.3%)  | 1.466 (3.9%)   | 1.329 (4.5%)   | 137 (1.8%)    | 1.567 (3.7%)   | 902 (4.1%)     | 665 (3.3%)    |
| C09C Angiotensin II receptor blockers (ARBs), plain        | 39 587 (4.5%)  | 28.894 (3.6%)  | 4.864 (13.1%)  | 4.565 (15.4%)  | 299 (4.0%)    | 5.829 (13.9%)  | 4.095 (18.8%)  | 1.734 (8.5%)  |
| C09D Angiotensin II receptor blockers (ARBs), combinations | 42 218 (4.8%)  | 31.549 (3.9%)  | 5.456 (14.7%)  | 5.122 (17.3%)  | 334 (4.5%)    | 5.213 (12.4%)  | 3.465 (15.9%)  | 1.748 (8.6%)  |
| C10 Lipid modifying agents                                 | 126 883(14.4%) | 94.811 (11.8%) | 17.696 (47.6%) | 16.763 (56.5%) | 933 (12.4%)   | 14.376 (34.2%) | 10.200 (46.9%) | 4.176 (20.6%) |
| C10A Lipid modifying agents, plain                         | 114 481(13.0%) | 85.677 (10.7%) | 15.555 (41.8%) | 14.704 (49.5%) | 851 (11.3%)   | 13.249 (31.5%) | 9.394 (43.2%)  | 3.855 (19.0%) |
| C10AA HMG CoA reductase inhibitors                         | 103 737(11.8%) | 76.997 (9.6%)  | 14.513 (39.0%) | 13.769 (46.4%) | 744 (9.9%)    | 12.227 (29.1%) | 8.805 (40.5%)  | 3.422 (16.9%) |
| C10B Lipid modifying agents, combinations                  | 15 103 (1.7%)  | 10.879 (1.4%)  | 2.648 (7.1%)   | 2.557 (8.6%)   | 91 (1.2%)     | 1.576 (3.7%)   | 1.189 (5.5%)   | 387 (1.9%)    |
| G03 Sex hormones and modulators of the genital system      | 35 355 (4.0%)  | 34.338 (4.3%)  | 509 (1.4%)     | 235 (0.8%)     | 274 (3.7%)    | 508 (1.2%)     | 148 (0.7%)     | 360 (1.8%)    |
| G03A Hormonal contraceptives for systemic use              | 28 919 (3.3%)  | 28.450 (3.5%)  | 208 (0.6%)     | 45 (0.2%)      | 163 (2.2%)    | 261 (0.6%)     | 44 (0.2%)      | 217 (1.1%)    |
| G03C Estrogens                                             | 1 076 (0.1%)   | 1.006 (0.1%)   | 33 (0.1%)      | 23 (0.1%)      | 10 (0.1%)     | 37 (0.1%)      | 14 (0.1%)      | 23 (0.1%)     |
| H02 Corticosteroids for systemic use                       | 44 826 (5.1%)  | 31.843 (4.0%)  | 3.078 (8.3%)   | 2.576 (8.7%)   | 502 (6.7%)    | 9.905 (23.6%)  | 6.181 (28.4%)  | 3.724 (18.3%) |
| H02A Corticosteroids for systemic use, plain               | 44.826 (5.1%)  | 31.843 (4.0%)  | 3.078 (8.3%)   | 2.576 (8.7%)   | 502 (6.7%)    | 9.905 (23.6%)  | 6.181 (28.4%)  | 3.724 (18.3%) |
| H02AB Glucocorticoids                                      | 44 783 (5.1%)  | 31.814 (4.0%)  | 3.072 (8.3%)   | 2.570 (8.7%)   | 502 (6.7%)    | 9.897 (23.5%)  | 6.177 (28.4%)  | 3.720 (18.3%) |
| J01 Antibacterials for systemic use                        | 156 686(17.8%) | 128.371(16.0%) | 10.337 (27.8%) | 8.492 (28.6%)  | 1.845 (24.6%) | 17.978 (42.8%) | 11.347 (52.2%) | 6.631 (32.7%) |
| J01C Beta-lactam antibacterials, penicillins               | 66 454 (7.5%)  | 55.560 (6.9%)  | 3.936 (10.6%)  | 3.229 (10.9%)  | 707 (9.4%)    | 6.958 (16.5%)  | 4.760 (21.9%)  | 2.198 (10.8%) |
| J01D Other beta-lactam antibacterials                      | 34 531 (3.9%)  | 23.189 (2.9%)  | 2.760 (7.4%)   | 2.397 (8.1%)   | 363 (4.8%)    | 8.582 (20.4%)  | 5.755 (26.5%)  | 2.827 (13.9%) |
| J01E Sulfonamides and trimethoprim                         | 3 580 (0.4%)   | 2.378 (0.3%)   | 366 (1.0%)     | 334 (1.1%)     | 32 (0.4%)     | 836 (2.0%)     | 689 (3.2%)     | 147 (0.7%)    |
| J01F Macrolides, lincosamides and streptogramins           | 43 404 (4.9%)  | 34.516 (4.3%)  | 2.786 (7.5%)   | 2.179 (7.3%)   | 607 (8.1%)    | 6.102 (14.5%)  | 3.408 (15.7%)  | 2.694 (13.3%) |
| J01G Aminoglycoside antibacterials                         | 878 (0.1%)     | 538 (0.1%)     | 74 (0.2%)      | 66 (0.2%)      | 8 (0.1%)      | 266 (0.6%)     | 232 (1.1%)     | 34 (0.2%)     |
| J01M Quinolone antibacterials                              | 24 953 (2.8%)  | 17.661 (2.2%)  | 2.329 (6.3%)   | 2.088 (7.0%)   | 241 (3.2%)    | 4.963 (11.8%)  | 3.606 (16.6%)  | 1.357 (6.7%)  |
| J01R Combinations of antibacterials                        | 623 (0.1%)     | 568 (0.1%)     | 27 (0.1%)      | 22 (0.1%)      | 5 (0.1%)      | 28 (0.1%)      | 16 (0.1%)      | 12 (0.1%)     |
| J01X Other antibacterials                                  | 34 403 (3.9%)  | 28.244 (3.5%)  | 2.572 (6.9%)   | 2.116 (7.1%)   | 456 (6.1%)    | 3.587 (8.5%)   | 2.629 (12.1%)  | 958 (4.7%)    |
| J05 Antivirals for systemic use                            | 8 847 (1.0%)   | 6.287 (0.8%)   | 499 (1.3%)     | 413 (1.4%)     | 86 (1.1%)     | 2.061 (4.9%)   | 1.063 (4.9%)   | 998 (4.9%)    |
| J05A Direct-acting antiviral drugs                         | 8 847 (1.0%)   | 6.287 (0.8%)   | 499 (1.3%)     | 413 (1.4%)     | 86 (1.1%)     | 2.061 (4.9%)   | 1.063 (4.9%)   | 998 (4.9%)    |
| L Antineoplastic and immunomodulatory agents               | 23 305 (2.6%)  | 17.459 (2.2%)  | 1.840 (4.9%)   | 1.607 (5.4%)   | 233 (3.1%)    | 4.006 (9.5%)   | 2.513 (11.6%)  | 1.493 (7.4%)  |

|                                                                 |                |                 |                |                |               |                |                |               |
|-----------------------------------------------------------------|----------------|-----------------|----------------|----------------|---------------|----------------|----------------|---------------|
| L01 Antineoplastic agents                                       | 4 136 (0.5%)   | 2.683 (0.3%)    | 434 (1.2%)     | 400 (1.3%)     | 34 (0.5%)     | 1.019 (2.4%)   | 786 (3.6%)     | 233 (1.1%)    |
| L01X Other antineoplastic agents                                | 2 451 (0.3%)   | 1.519 (0.2%)    | 302 (0.8%)     | 283 (1.0%)     | 19 (0.3%)     | 630 (1.5%)     | 501 (2.3%)     | 129 (0.6%)    |
| L01XX05 Hydroxycarbamide/Hydroxyurea                            | 443 (0.1%)     | 235 (0.0%)      | 127 (0.3%)     | 125 (0.4%)     | 2 (0.0%)      | 81 (0.2%)      | 78 (0.4%)      | 3 (0.0%)      |
| L02 Endocrine therapy                                           | 5 834 (0.7%)   | 4.403 (0.5%)    | 556 (1.5%)     | 500 (1.7%)     | 56 (0.7%)     | 875 (2.1%)     | 653 (3.0%)     | 222 (1.1%)    |
| L02A Hormones and related agents                                | 2720 (0.3%)    | 1.808 (0.2%)    | 337 (0.9%)     | 312 (1.1%)     | 25 (0.3%)     | 575 (1.4%)     | 449 (2.1%)     | 126 (0.6%)    |
| L02B Hormone antagonists and related agents                     | 3 803 (0.4%)   | 3.082 (0.4%)    | 292 (0.8%)     | 252 (0.8%)     | 40 (0.5%)     | 429 (1.0%)     | 299 (1.4%)     | 130 (0.6%)    |
| L03A Immunostimulants                                           | 1 639 (0.2%)   | 1.077 (0.1%)    | 84 (0.2%)      | 74 (0.2%)      | 10 (0.1%)     | 478 (1.1%)     | 323 (1.5%)     | 155 (0.8%)    |
| L04A Immunosuppressants                                         | 13 155 (1.5%)  | 10.186 (1.3%)   | 867 (2.3%)     | 721 (2.4%)     | 146 (1.9%)    | 2.102 (5.0%)   | 1.105 (5.1%)   | 997 (4.9%)    |
| M01 Anti-inflammatory and antirheumatic products                | 170 874(19.4%) | 155.790 (19.4%) | 6.652 (17.9%)  | 5.168 (17.4%)  | 1.484 (19.8%) | 8.432 (20.1%)  | 4.111 (18.9%)  | 4.321 (21.3%) |
| M01A Anti-inflammatory and antirheumatic products, non-steroids | 169 812(19.2%) | 154.874 (19.3%) | 6.578 (17.7%)  | 5.101 (17.2%)  | 1.477 (19.7%) | 8.360 (19.9%)  | 4.067 (18.7%)  | 4.293 (21.1%) |
| N03A Antiepileptics                                             | 39 658 (4.5%)  | 31.077 (3.9%)   | 3.679 (9.9%)   | 3.371 (11.4%)  | 308 (4.1%)    | 4.902 (11.7%)  | 3.493 (16.1%)  | 1.409 (6.9%)  |
| N05 Psycholeptics                                               | 158 162(17.9%) | 127.359 (15.9%) | 13.500 (36.3%) | 12.083 (40.7%) | 1.417 (18.9%) | 17.303 (41.1%) | 11.575 (53.2%) | 5.728 (28.2%) |
| N05A Antipsychotics                                             | 38 386 (4.3%)  | 28.667 (3.6%)   | 3.754 (10.1%)  | 3.352 (11.3%)  | 402 (5.4%)    | 5.965 (14.2%)  | 4.324 (19.9%)  | 1.641 (8.1%)  |
| N05B Anxiolytics                                                | 118 541(13.4%) | 96.771 (12.0%)  | 9.539 (25.7%)  | 8.522 (28.7%)  | 1.017 (13.6%) | 12.231 (29.1%) | 8.098 (37.2%)  | 4.133 (20.4%) |
| N05C Hypnotics and sedatives                                    | 32 824 (3.7%)  | 25.035 (3.1%)   | 3.220 (8.7%)   | 2.940 (9.9%)   | 280 (3.7%)    | 4.569 (10.9%)  | 3.250 (14.9%)  | 1.319 (6.5%)  |
| N06 Psychoanaleptics                                            | 89 785 (10.2%) | 72.612 (9.0%)   | 8.011 (21.5%)  | 7.240 (24.4%)  | 771 (10.3%)   | 9.162 (21.8%)  | 6.456 (29.7%)  | 2.706 (13.3%) |
| N06A Antidepressants                                            | 89 785 (10.2%) | 72.612 (9.0%)   | 8.011 (21.5%)  | 7.240 (24.4%)  | 771 (10.3%)   | 9.162 (21.8%)  | 6.456 (29.7%)  | 2.706 (13.3%) |
| R03 Drugs for obstructive airway diseases                       | 67 622 (7.7%)  | 52.928 (6.6%)   | 5.184 (13.9%)  | 4.525 (15.2%)  | 659 (8.8%)    | 9.510 (22.6%)  | 6.288 (28.9%)  | 3.222 (15.9%) |
| R03A Adrenergic, inhalants                                      | 51 322 (5.8%)  | 40.259 (5.0%)   | 3.766 (10.1%)  | 3.242 (10.9%)  | 524 (7.0%)    | 7.297 (17.4%)  | 4.828 (22.2%)  | 2.469 (12.2%) |
| R03B Other drugs for obstructive airway diseases, inhalants     | 19 887 (2.3%)  | 12.819 (1.6%)   | 1.920 (5.2%)   | 1.740 (5.9%)   | 180 (2.4%)    | 5.148 (12.2%)  | 3.699 (17.0%)  | 1.449 (7.1%)  |
| R03D Other systemic drugs for obstructive airway diseases       | 16 508 (1.9%)  | 13.396 (1.7%)   | 1.187 (3.2%)   | 1.065 (3.6%)   | 122 (1.6%)    | 1.925 (4.6%)   | 1.268 (5.8%)   | 657 (3.2%)    |

Table S4. Baseline characteristics by gender

| COVID-19 ANTITHROMBOTIC USERS<br>n=79,234 (9%) |                               |                                |                                       |                                |                                              |                               |                                                   |                               |                                                |                             |                                       |                               |                                               |                              |                                             |                             |                                          |                              |
|------------------------------------------------|-------------------------------|--------------------------------|---------------------------------------|--------------------------------|----------------------------------------------|-------------------------------|---------------------------------------------------|-------------------------------|------------------------------------------------|-----------------------------|---------------------------------------|-------------------------------|-----------------------------------------------|------------------------------|---------------------------------------------|-----------------------------|------------------------------------------|------------------------------|
| CHARACTERISTICS                                | ALL CASES<br>n=882,540 (100%) |                                | COVID-19 NON-USERS<br>n=803,306 (91%) |                                | PRIMARY CARE -<br>GLOBAL<br>n=37,183 (46,9%) |                               | PRIMARY CARE –<br>PRIOR USERS<br>n=29,678 (79,8%) |                               | PRIMARY CARE –<br>NEW USERS<br>n=7,505 (20,2%) |                             | HOSPITAL - GLOBAL<br>n=42,051 (53,1%) |                               | HOSPITAL – PRIOR<br>USERS<br>n=21,751 (51,7%) |                              | HOSPITAL – NEW<br>USERS<br>n=20,300 (48,3%) |                             | POSTDISCHARGE<br>USERS<br>n=6,686 (0,2%) |                              |
|                                                | MALE<br>n=411,273<br>(46,6%)  | FEMALE<br>n=471,267<br>(53,4%) | MALE<br>n=370,296<br>(46,1%)          | FEMALE<br>n=433,010<br>(53,9%) | MALE<br>n=17,639<br>(47,4%)                  | FEMALE<br>n=19,544<br>(52,6%) | MALE<br>n=15,215<br>(51,3%)                       | FEMALE<br>n=14,463<br>(48,7%) | MALE<br>n=2424<br>(32,3%)                      | FEMALE<br>n=5081<br>(67,7%) | MALE<br>n=23,338<br>(55,5%)           | FEMALE<br>n=18,713<br>(45,5%) | MALE<br>n=11,887<br>(54,7%)                   | FEMALE<br>n=9,864<br>(45,3%) | MALE<br>8,849<br>(45,6%)                    | FEMALE<br>11,451<br>(56,4%) | MALE<br>n=3,027<br>(45,3%)               | FEMALE<br>n=3,659<br>(54,7%) |
|                                                |                               |                                |                                       |                                |                                              |                               |                                                   |                               |                                                |                             |                                       |                               |                                               |                              |                                             |                             |                                          |                              |
| Age ( y )                                      |                               |                                |                                       |                                |                                              |                               |                                                   |                               |                                                |                             |                                       |                               |                                               |                              |                                             |                             |                                          |                              |
| Mean/median                                    | 46.9 / 45<br>years            | 47.9 / 46<br>years             | 44.6 / 43<br>years                    | 46.0 / 44<br>years             | 67.6 /<br>68.0 years                         | 67.8 / 73<br>years            | 69.5 /<br>70.0 years                              | 74.5 / 78<br>years            | 55.6 /<br>55.0<br>years                        | 48.4 / 43<br>years          | 66.9 /<br>68.0 years                  | 69.4 / 73<br>years            | 74.3 /<br>76.0 years                          | 77.1 / 81<br>years           | 59.3 /<br>59.0<br>years                     | 60.8 / 61<br>years          | 70.9 /<br>73.0<br>years                  | 74.8 / 79<br>years           |
| 18-25                                          | 49155<br>(12%)                | 51449<br>(10.9%)               | 48890<br>(13.2%)                      | 50884<br>(11.8%)               | 474<br>(0.6%)                                | 2586<br>(1.6%)                | 172<br>(0.2%)                                     | 320<br>(0.3%)                 | 302<br>(3%)                                    | 1980<br>(5.4%)              | 1231<br>(0.7%)                        | 1349<br>(1.3%)                | 154<br>(0.1%)                                 | 249<br>(0.3%)                | 1100<br>(2.5%)                              | 1077<br>(1.3%)              | 107<br>(0.6%)                            | 17<br>(0.2%)                 |
| 25-40                                          | 103653<br>(25.2%)             | 119716<br>(25.4%)              | 101948<br>(27.5%)                     | 115781<br>(26.7%)              | 474<br>(2.7%)                                | 2586<br>(13.2%)               | 172<br>(1.1%)                                     | 320<br>(4%)                   | 302<br>(12.4%)                                 | 1980<br>(39%)               | 1231<br>(5.3%)                        | 1349<br>(7.2%)                | 154<br>(1.3%)                                 | 249<br>(2.5%)                | 1100<br>(12.4%)                             | 1077<br>(9.4%)              | 107<br>(3.5%)                            | 17<br>(2.6%)                 |
| 40-55                                          | 127619<br>(31%)               | 148368<br>(31.5%)              | 121001<br>(32.7%)                     | 143512<br>(33.1%)              | 2518<br>(14.3%)                              | 2240<br>(11.5%)               | 1718<br>(11.3%)                                   | 1152<br>(7.6%)                | 800<br>(33%)                                   | 1088<br>(21.4%)             | 4100<br>(17.6%)                       | 2616<br>(14%)                 | 861<br>(7.2%)                                 | 642<br>(6.5%)                | 1974<br>(22.3%)                             | 3239<br>(28.3%)             | 246<br>(8.1%)                            | 392<br>(10.7%)               |
| 55-70                                          | 80026<br>(19.5%)              | 83483<br>(17.7%)               | 66776<br>(18%)                        | 75731<br>(17.5%)               | 6458<br>(36.6%)                              | 3670<br>(18.8%)               | 5665<br>(37.2%)                                   | 2797<br>(18.4%)               | 793<br>(33%)                                   | 873<br>(17.2%)              | 6792<br>(29.1%)                       | 4082<br>(21.8%)               | 2857<br>(24%)                                 | 1560<br>(15.8%)              | 2522<br>(28.5%)                             | 3935<br>(34.4%)             | 526<br>(17.4%)                           | 1044<br>(28.5%)              |
| >70                                            | 50820<br>(12.4%)              | 68251<br>(14.5%)               | 31681<br>(8.6%)                       | 47102<br>(10.9%)               | 8091<br>(45.9%)                              | 10728<br>(54.9%)              | 7628<br>(50.1%)                                   | 9862<br>(64.8%)               | 463<br>(19.1%)                                 | 866<br>(17%)                | 11048<br>(47.3%)                      | 10421<br>(55.7%)              | 8000<br>(67.3%)                               | 7385<br>(74.9%)              | 3036<br>(34.3%)                             | 3048<br>(26.6%)             | 2131<br>(70.4%)                          | 2122<br>(58%)                |
| Comorbidities                                  |                               |                                |                                       |                                |                                              |                               |                                                   |                               |                                                |                             |                                       |                               |                                               |                              |                                             |                             |                                          |                              |
| Obesity                                        | 40.076<br>(9.7%)              | 56.924<br>(12.1%)              | 32.110<br>(8.7%)                      | 48.219<br>(11.1%)              | 3.660<br>(20,7%)                             | 4.083<br>(23,1%)              | 3293<br>(21,6%)                                   | 3483<br>(24,1%)               | 367<br>(15,1%)                                 | 600<br>(11,8%)              | 4309<br>(18,5%)                       | 4619<br>(24,7%)               | 4309<br>(36,2%)                               | 2758<br>(28,5%)              | 1713<br>(19,4%)                             | 1861<br>(21%)               | 829<br>(27,4%)                           | 835<br>(22,8%)               |
| Cardiovascular<br>diseases                     | 117.895<br>(28.7%)            | 120.281<br>(25.5%)             | 89.889<br>(24.3%)                     | 96.060<br>(22.2%)              | 13.883<br>(78,7%)                            | 12.608<br>(71,5%)             | 13034<br>(85,7%)                                  | 11396<br>(78,8%)              | 849<br>(35%)                                   | 1212<br>(23,9%)             | 14123<br>(60,5%)                      | 11613<br>(62,1%)              | 9527<br>(80,1%)                               | 7806<br>(80,6%)              | 4596<br>(51,9%)                             | 3807<br>(43%)               | 2710<br>(89,5%)                          | 2218<br>(60,6%)              |
| Hypertension                                   | 93.482<br>(22.7%)             | 97.872<br>(20.8%)              | 71.225<br>(19.2%)                     | 76.819<br>(17.7%)              | 10.471<br>(59,4%)                            | 10.698<br>(60,6%)             | 9743<br>(64%)                                     | 9668<br>(66,8%)               | 728<br>(30%)                                   | 1030<br>(20,3%)             | 11786<br>(50,5%)                      | 10355<br>(55,3%)              | 1178<br>(9,9%)                                | 6936<br>(71,6%)              | 4132<br>(46,7%)                             | 3419<br>(38,6%)             | 2184<br>(72,2%)                          | 1970<br>(53,8%)              |
| Heart<br>insufficiency                         | 7.601<br>(1.8%)               | 9.237<br>(2%)                  | 4.160<br>(1.1%)                       | 5.387<br>(1.2%)                | 1.337<br>(7,6%)                              | 1.827<br>(10,4%)              | 1304<br>(8,6%)                                    | 1778<br>(12,3%)               | 33<br>(1,4%)                                   | 49<br>(1%)                  | 2104<br>(9%)                          | 2023<br>(10,8%)               | 2104<br>(17,7%)                               | 1807<br>(18,7%)              | 186<br>(2,1%)                               | 216<br>(2,4%)               | 439<br>(14,5%)                           | 442<br>(12,1%)               |
| Arrythmia                                      | 29.665<br>(7.2%)              | 31.952<br>(6.8%)               | 21.361<br>(5.8%)                      | 24.367<br>(5.6%)               | 4.330<br>(24,5%)                             | 4.428<br>(25,1%)              | 4189<br>(27,5%)                                   | 4204<br>(29,1%)               | 141<br>(5,8%)                                  | 224<br>(4,4%)               | 3974<br>(17%)                         | 3157<br>(16,9%)               | 3974<br>(33,4%)                               | 2628<br>(27,1%)              | 608<br>(6,9%)                               | 529<br>(6%)                 | 868<br>(28,7%)                           | 676<br>(18,5%)               |
| Ischemic heart disease                         | 18.936<br>(4.6%)              | 10.765<br>(2.3%)               | 10.446<br>(2.8%)                      | 6.905<br>(1.6%)                | 5.312<br>(30,1%)                             | 2.361<br>(13,4%)              | 5282<br>(34,7%)                                   | 2323<br>(16,1%)               | 30<br>(1,2%)                                   | 38<br>(0,7%)                | 3178<br>(13,6%)                       | 1499<br>(8%)                  | 3178<br>(26,7%)                               | 1349<br>(13,9%)              | 188<br>(2,1%)                               | 150<br>(1,7%)               | 853<br>(28,2%)                           | 383<br>(10,5%)               |
| Coronary artery<br>disease                     | 12.435<br>(3%)                | 6.554<br>(1.4%)                | 6.326<br>(1.7%)                       | 3.685<br>(0.9%)                | 3.794<br>(21,5%)                             | 1.782<br>(10,1%)              | 3775<br>(24,8%)                                   | 1759<br>(12,2%)               | 19<br>(0,8%)                                   | 23<br>(0,5%)                | 2315<br>(9,9%)                        | 1087<br>(5,8%)                | 2315<br>(19,5%)                               | 1025<br>(10,6%)              | 80<br>(0,9%)                                | 62<br>(0,7%)                | 699<br>(23,1%)                           | 318<br>(8,7%)                |
| Myocardial<br>infarction                       | 7.934<br>(1.9%)               | 2.529<br>(0.5%)                | 3.805<br>(1%)                         | 1.303<br>(0.3%)                | 2.749<br>(15,6%)                             | 827<br>(4,7%)                 | 2739<br>(18%)                                     | 819<br>(5,7%)                 | 10<br>(0,4%)                                   | 8<br>(0,2%)                 | 1380<br>(5,9%)                        | 399<br>(2,1%)                 | 1380<br>(11,6%)                               | 376<br>(3,9%)                | 37<br>(0,4%)                                | 23<br>(0,3%)                | 362<br>(12%)                             | 103<br>(2,8%)                |

|                     |        |        |        |        |         |         |         |         |        |        |         |         |         |         |         |        |         |         |
|---------------------|--------|--------|--------|--------|---------|---------|---------|---------|--------|--------|---------|---------|---------|---------|---------|--------|---------|---------|
|                     | 3.053  | 3.815  | 1.804  | 2.540  | 633     | 707     | 619     | 670     | 14     | 37     | 616     | 568     | 616     | 473     | 63      | 95     | 130     | 117     |
| Valvopathies        | (0.7%) | (0.8%) | (0.5%) | (0.6%) | (3,6%)  | (4%)    | (4,1%)  | (4,6%)  | (0,6%) | (0,7%) | (2,6%)  | (3%)    | (5,2%)  | (4,9%)  | (0,7%)  | (1,1%) | (4,3%)  | (3,2%)  |
| Peripheral artery   | 4.821  | 2.077  | 2.491  | 1.399  | 1.239   | 399     | 1227    | 387     | 12     | 12     | 1091    | 279     | 1091    | 239     | 78      | 40     | 250     | 58      |
| disease             | (1.2%) | (0.4%) | (0.7%) | (0.3%) | (7%)    | (2,3%)  | (8,1%)  | (2,7%)  | (0,5%) | (0,2%) | (4,7%)  | (1,5%)  | (9,2%)  | (2,5%)  | (0,9%)  | (0,5%) | (8,3%)  | (1,6%)  |
|                     | 23.997 | 30.849 | 18.091 | 26.006 | 2.401   | 2.191   | 2248    | 1930    | 153    | 261    | 3505    | 2652    | 3505    | 1802    | 993     | 850    | 576     | 417     |
| Cancer history      | (5.8%) | (6.5%) | (4.9%) | (6%)   | (13,6%) | (12,4%) | (14,8%) | (13,3%) | (6,3%) | (5,1%) | (15%)   | (14,2%) | (29,5%) | (18,6%) | (11,2%) | (9,6%) | (19%)   | (11,4%) |
| Hereditary          | 186    | 468    | 131    | 372    | 39      | 72      | 34      | 54      | 5      | 18     | 16      | 24      | 16      | 19      | 1       | 5      | 5       | 8       |
| thrombophilia       | (0%)   | (0.1%) | (0%)   | (0.1%) | (0,2%)  | (0,4%)  | (0,2%)  | (0,4%)  | (0,2%) | (0,4%) | (0,1%)  | (0,1%)  | (0,1%)  | (0,2%)  | (0%)    | (0,1%) | (0,2%)  | (0,2%)  |
|                     | 10.056 | 10.326 | 5.203  | 5.759  | 2.713   | 2.902   | 2696    | 2859    | 17     | 43     | 2140    | 1665    | 2140    | 1564    | 127     | 101    | 511     | 416     |
| Stroke              | (2.4%) | (2.2%) | (1.4%) | (1.3%) | (15,4%) | (16,5%) | (17,7%) | (19,8%) | (0,7%) | (0,8%) | (9,2%)  | (8,9%)  | (18%)   | (16,2%) | (1,4%)  | (1,1%) | (16,9%) | (11,4%) |
|                     | 9.381  | 9.586  | 4.734  | 5.159  | 2.644   | 2.827   | 2630    | 2790    | 14     | 37     | 2039    | 1564    | 2039    | 1490    | 96      | 74     | 499     | 401     |
| Ischemic stroke     | (2.3%) | (2%)   | (1.3%) | (1.2%) | (15%)   | (16%)   | (17,3%) | (19,3%) | (0,6%) | (0,7%) | (8,7%)  | (8,4%)  | (17,2%) | (15,4%) | (1,1%)  | (0,8%) | (16,5%) | (11%)   |
|                     | 1.025  | 1.070  | 708    | 775    | 137     | 150     | 134     | 143     | 3      | 7      | 180     | 145     | 180     | 114     | 38      | 31     | 32      | 26      |
| Hemorrhagic stroke  | (0.2%) | (0.2%) | (0.2%) | (0.2%) | (0,8%)  | (0,9%)  | (0,9%)  | (1%)    | (0,1%) | (0,1%) | (0,8%)  | (0,8%)  | (1,5%)  | (1,2%)  | (0,4%)  | (0,4%) | (1,1%)  | (0,7%)  |
|                     | 60     | 43     | 52     | 33     | 3       | 6       | 2       | 6       | 1      | 0      | 5       | 4       | 5       | 2       | 2       | 2      | 0       | 0       |
| Acute liver disease | (0%)   | (0%)   | (0%)   | (0%)   | (0%)    | (0%)    | (0%)    | (0%)    | (0%)   | (0%)   | (0%)    | (0%)    | (0%)    | (0%)    | (0%)    | (0%)   | (0%)    | (0%)    |
|                     | 8.894  | 9.423  | 5.467  | 6.166  | 1.359   | 1.532   | 1310    | 1470    | 49     | 62     | 2068    | 1725    | 2068    | 1409    | 360     | 316    | 394     | 368     |
| CKD                 | (2.2%) | (2%)   | (1.5%) | (1.4%) | (7,7%)  | (8,7%)  | (8,6%)  | (10,2%) | (2%)   | (1,2%) | (8,9%)  | (9,2%)  | (17,4%) | (14,5%) | (4,1%)  | (3,6%) | (13%)   | (10,1%) |
|                     | 12.500 | 5.462  | 8.026  | 4.138  | 1.634   | 575     | 1543    | 521     | 91     | 54     | 2840    | 749     | 2840    | 554     | 707     | 195    | 530     | 146     |
| COPD                | (3%)   | (1.2%) | (2.2%) | (1%)   | (9,3%)  | (3,3%)  | (10,1%) | (3,6%)  | (3,8%) | (1,1%) | (12,2%) | (4%)    | (23,9%) | (5,7%)  | (8%)    | (2,2%) | (17,5%) | (4%)    |
|                     | 33.175 | 44.799 | 30.711 | 40.596 | 1.005   | 2.024   | 825     | 1515    | 180    | 509    | 1459    | 2179    | 1459    | 1301    | 748     | 878    | 221     | 374     |
| Asthma              | (8.1%) | (9.5%) | (8.3%) | (9.4%) | (5,7%)  | (11,5%) | (5,4%)  | (10,5%) | (7,4%) | (10%)  | (6,3%)  | (11,6%) | (12,3%) | (13,4%) | (8,5%)  | (9,9%) | (7,3%)  | (10,2%) |
|                     | 536    | 1.208  | 467    | 1.098  | 30      | 40      | 25      | 26      | 5      | 14     | 39      | 70      | 39      | 31      | 16      | 39     | 5       | 8       |
| Multiple sclerosis  | (0.1%) | (0.3%) | (0.1%) | (0.3%) | (0,2%)  | (0,2%)  | (0,2%)  | (0,2%)  | (0,2%) | (0,3%) | (0,2%)  | (0,4%)  | (0,3%)  | (0,3%)  | (0,2%)  | (0,4%) | (0,2%)  | (0,2%)  |
|                     | 1.926  | 2.199  | 1.157  | 1.448  | 304     | 354     | 287     | 321     | 17     | 33     | 465     | 397     | 465     | 291     | 102     | 106    | 77      | 76      |
| Parkinson's disease | (0.5%) | (0.5%) | (0.3%) | (0.3%) | (1,7%)  | (2%)    | (1,9%)  | (2,2%)  | (0,7%) | (0,6%) | (2%)    | (2,1%)  | (3,9%)  | (3%)    | (1,2%)  | (1,2%) | (2,5%)  | (2,1%)  |
|                     | 2.812  | 7.786  | 1.649  | 5.157  | 434     | 1.436   | 404     | 1314    | 30     | 122    | 729     | 1193    | 729     | 918     | 145     | 275    | 105     | 225     |
| Dementia            | (0.7%) | (1.7%) | (0.4%) | (1.2%) | (2,5%)  | (8,1%)  | (2,7%)  | (9,1%)  | (1,2%) | (2,4%) | (3,1%)  | (6,4%)  | (6,1%)  | (9,5%)  | (1,6%)  | (3,1%) | (3,5%)  | (6,1%)  |
|                     | 2.625  | 4.169  | 776    | 2.828  | 185     | 716     | 172     | 634     | 13     | 82     | 323     | 625     | 323     | 464     | 75      | 161    | 43      | 116     |
| Alzheimer           | (0.6%) | (0.9%) | (0.2%) | (0.7%) | (1%)    | (4,1%)  | (1,1%)  | (4,4%)  | (0,5%) | (1,6%) | (1,4%)  | (3,3%)  | (2,7%)  | (4,8%)  | (0,8%)  | (1,8%) | (1,4%)  | (3,2%)  |
|                     | 2.824  | 2.940  | 2.504  | 2.692  | 132     | 122     | 113     | 86      | 19     | 36     | 188     | 126     | 188     | 73      | 89      | 53     | 28      | 13      |
| IBD                 | (0.7%) | (0.6%) | (0.7%) | (0.6%) | (0,7%)  | (0,7%)  | (0,7%)  | (0,6%)  | (0,8%) | (0,7%) | (0,8%)  | (0,7%)  | (1,6%)  | (0,8%)  | (1%)    | (0,6%) | (0,9%)  | (0,4%)  |
